# Supplementary material
Source: Springer Nature journal article supplement (https://www.springermedizin.de/resource/supplementary/12974_2011_449_MOESM7_ESM.pdf/9601328)

A

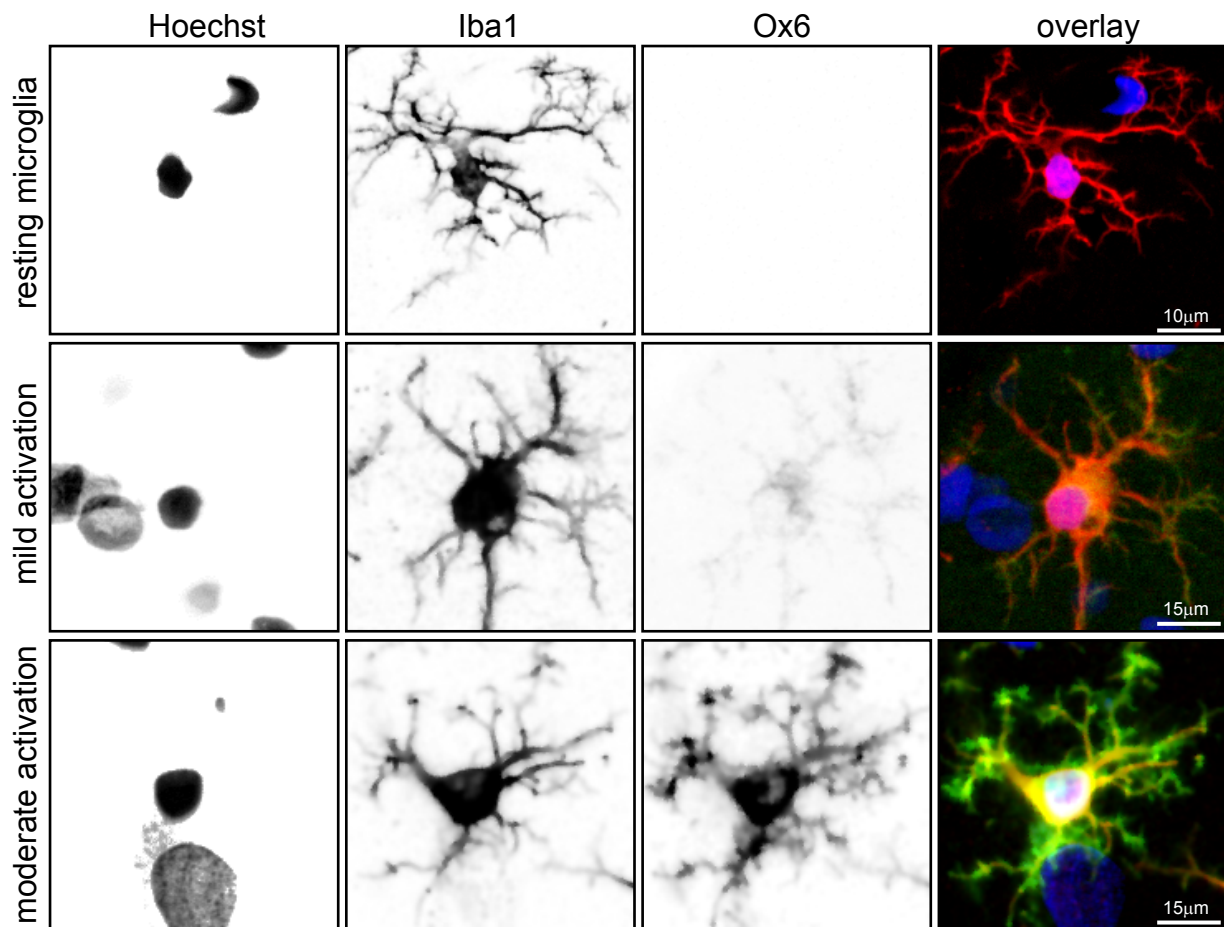

B

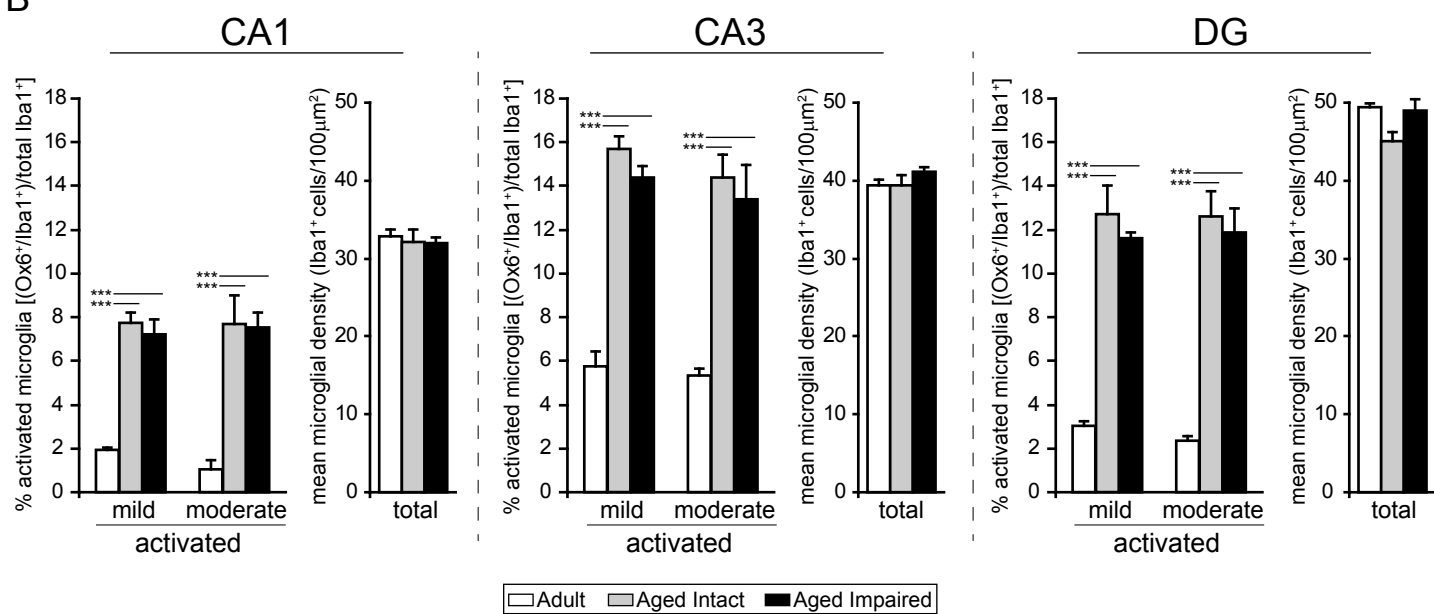

Supplement: MOESM7 [file 9601328]
